# Supplementary material for: Hyperbranched polymer hydrogels with large stimuli-responsive changes in storage moduli and peroxide-induced healing
Source: Royal Society of Chemistry journal article supplement (doi:10.1039/d1py00560j), 2021-01-01
Supplement: d1py00560j1.pdf [file d1py00560j1.pdf]

Electronic Supplementary Information (ESI)

**Hyperbranched polymer hydrogels with large stimuli-responsive changes in storage moduli  
and peroxide-induced healing**

Prathyusha Chimala, M. Mario Perera, Aissatou Wade, Tucker McKenzie, Joshua Allor and Neil

Ayres\*

Address: Department of Chemistry, The University of Cincinnati, Cincinnati, OH 45221

\*Corresponding Author: Phone +01 513 556 9280; Fax +01 513 556 9239; E-mail  
Neil.Ayres@UC.edu

| Contents          |                                                                                                                                                                                                                                                                                           | Page       |
|-------------------|-------------------------------------------------------------------------------------------------------------------------------------------------------------------------------------------------------------------------------------------------------------------------------------------|------------|
| <b>Figure S1</b>  | <sup>1</sup> H NMR spectrum of 2-hydroxypropyl methacrylate (HPMA).                                                                                                                                                                                                                       | <b>S3</b>  |
| <b>Figure S2</b>  | <sup>13</sup> C NMR spectrum of HPMA.                                                                                                                                                                                                                                                     | <b>S3</b>  |
| <b>Figure S3</b>  | <sup>1</sup> H NMR spectrum of hydroxyethylpyridyl disulfide (HPDS).                                                                                                                                                                                                                      | <b>S4</b>  |
| <b>Figure S4</b>  | <sup>13</sup> C NMR spectrum of HPDS.                                                                                                                                                                                                                                                     | <b>S4</b>  |
| <b>Figure S5</b>  | <sup>1</sup> H NMR spectrum of pyridyl disulfide ethylmethacrylate (PDSEMA).                                                                                                                                                                                                              | <b>S5</b>  |
| <b>Figure S6</b>  | <sup>13</sup> C NMR spectrum of PDSEMA.                                                                                                                                                                                                                                                   | <b>S5</b>  |
| <b>Figure S7</b>  | <sup>1</sup> H NMR spectrum of ACDT.                                                                                                                                                                                                                                                      | <b>S6</b>  |
| <b>Figure S8</b>  | <sup>13</sup> C NMR spectrum of ACDT.                                                                                                                                                                                                                                                     | <b>S6</b>  |
| <b>Figure S9</b>  | <sup>1</sup> H NMR spectrum of hb-poly(HPMA <sub>84</sub> -stat-PDSEMA <sub>24</sub> ).                                                                                                                                                                                                   | <b>S7</b>  |
| <b>Figure S10</b> | <sup>1</sup> H NMR spectrum of l-poly(HPMA <sub>104</sub> -stat-PDSEMA <sub>16</sub> ).                                                                                                                                                                                                   | <b>S7</b>  |
| <b>Figure S11</b> | <sup>1</sup> H NMR spectrum of hb-poly(HPMA <sub>84</sub> -stat-MEMA <sub>24</sub> ).                                                                                                                                                                                                     | <b>S8</b>  |
| <b>Figure S12</b> | <sup>1</sup> H NMR spectrum of l-poly(HPMA <sub>104</sub> -stat-MEMA <sub>16</sub> ).                                                                                                                                                                                                     | <b>S8</b>  |
| <b>Figure S13</b> | <sup>1</sup> H NMR spectrum of PEG (top figure) and Norbornene modified PEG (PEG-diNB) (bottom figure).                                                                                                                                                                                   | <b>S9</b>  |
| <b>Figure S14</b> | Standard calibration curve of Ellman's assay using DTT.                                                                                                                                                                                                                                   | <b>S9</b>  |
| <b>Figure S15</b> | UV-VIS absorbance curve for l-poly(HPMA <sub>104</sub> -stat-PDSEMA <sub>16</sub> ).                                                                                                                                                                                                      | <b>S10</b> |
| <b>Table S1</b>   | Storage moduli, swelling ratio, and gel fractions for the hb-Poly(HPMA- <i>stat</i> -MEMA)s prepared in this work taking 10 wt% solid content at different thiol to ene (T:E) ratios.                                                                                                     | <b>S10</b> |
| <b>Table S2</b>   | Storage moduli, swelling ratio, and gel fractions for the hb-Poly(HPMA <sub>84</sub> - <i>stat</i> -MEMA <sub>24</sub> )s prepared in this work using 20 wt% solid content and 5 wt% solid content.                                                                                       | <b>S11</b> |
| <b>Figure S16</b> | Storage moduli, G', of hydrogels synthesized using hb-poly(HPMA <sub>84</sub> - <i>stat</i> -MEMA <sub>24</sub> ) using a) 20 wt %, b) 10 wt%, and c) 5 wt % solids with different thiol to ene ratios before (black squares) and after (white squares) softening with 2-mercaptoethanol. | <b>S12</b> |
| <b>Table S3</b>   | Storage moduli and thiol concentrations before and after adding 2-mercaptoethanol for gels made using the hb-Poly(HPMA- <i>stat</i> -MEMA)s prepared in this work using 10 wt% solid content at different thiol to ene (T:E) ratios.                                                      | <b>S13</b> |
| <b>Table S4</b>   | Storage moduli and thiol concentrations before and after adding 2-                                                                                                                                                                                                                        | <b>S13</b> |

|                   |                                                                                                                                                                                                                                                                                                                                                                                                                      |            |
|-------------------|----------------------------------------------------------------------------------------------------------------------------------------------------------------------------------------------------------------------------------------------------------------------------------------------------------------------------------------------------------------------------------------------------------------------|------------|
|                   | mercaptoethanol for gels made using the l-Poly(HPMA- <i>stat</i> -MEMA)s prepared in this work at different thiol to ene (T:E) ratios.                                                                                                                                                                                                                                                                               |            |
| <b>Figure S17</b> | Storage moduli, G', of hydrogels synthesized using l-poly(HPMA <sub>104</sub> - <i>stat</i> -MEMA <sub>16</sub> ) at the same thiol concentrations and weight percent solids to the hyperbranched polymers with different thiol to ene ratios before (black squares) and after (white squares) softening with 2-mercaptoethanol.                                                                                     | <b>S14</b> |
| <b>Figure S18</b> | Storage moduli, G', before (black bar) and after softening of hydrogels (red bar) and then reducing with TCEP (blue bar) and after peroxide-induced healing of gels (pink bar) prepared using l-poly(HPMA <sub>104</sub> - <i>stat</i> -MEMA <sub>16</sub> ) maintaining the same thiol concentration and weight percent solids as the hyperbranched polymers at that thiol to ene ratio.                            | <b>S14</b> |
| <b>Figure S19</b> | Thiol concentrations (x10 <sup>4</sup> mmol/g) before (black bar) and after softening of hydrogels (red bar) and then reducing with TCEP (blue bar) and after peroxide-induced healing of gels (pink bar) prepared using l-poly(HPMA <sub>104</sub> - <i>stat</i> -MEMA <sub>16</sub> ) maintaining the same thiol concentration and weight percent solids as the hyperbranched polymers at that thiol to ene ratio. | <b>S15</b> |

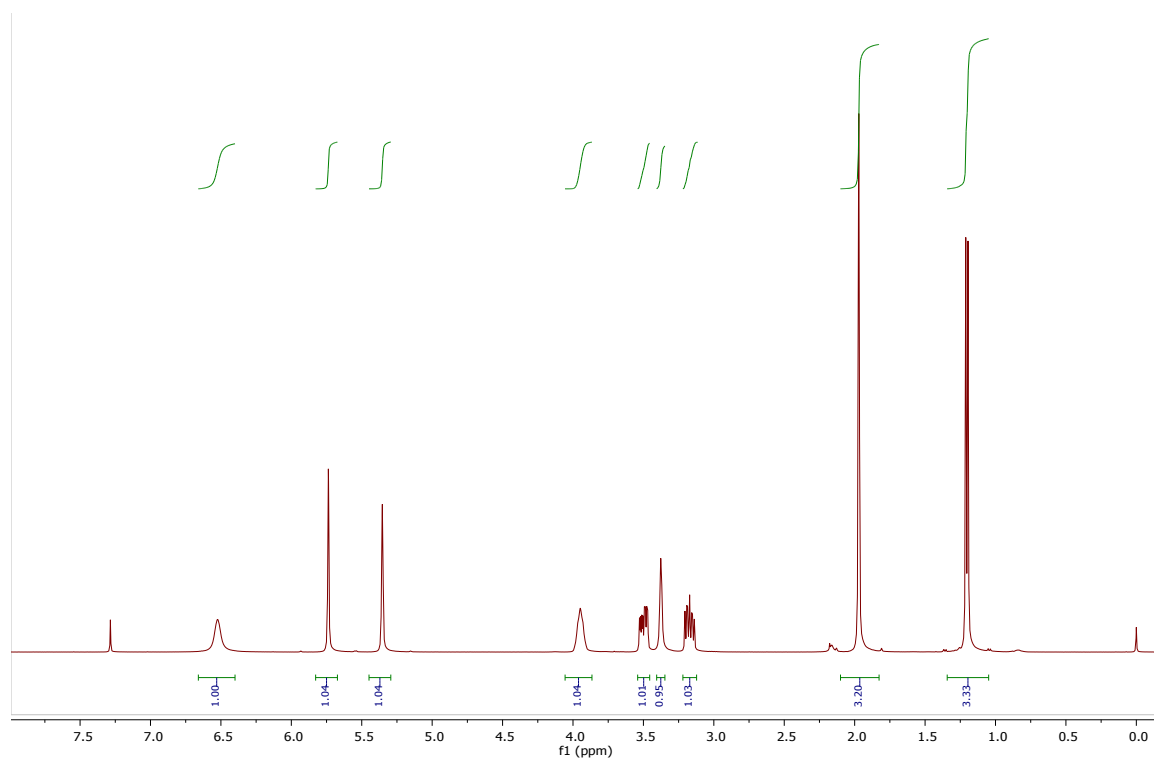

**Figure S1.**  $^1\text{H}$  NMR spectrum of 2-hydroxypropyl methacrylate (HPMA).

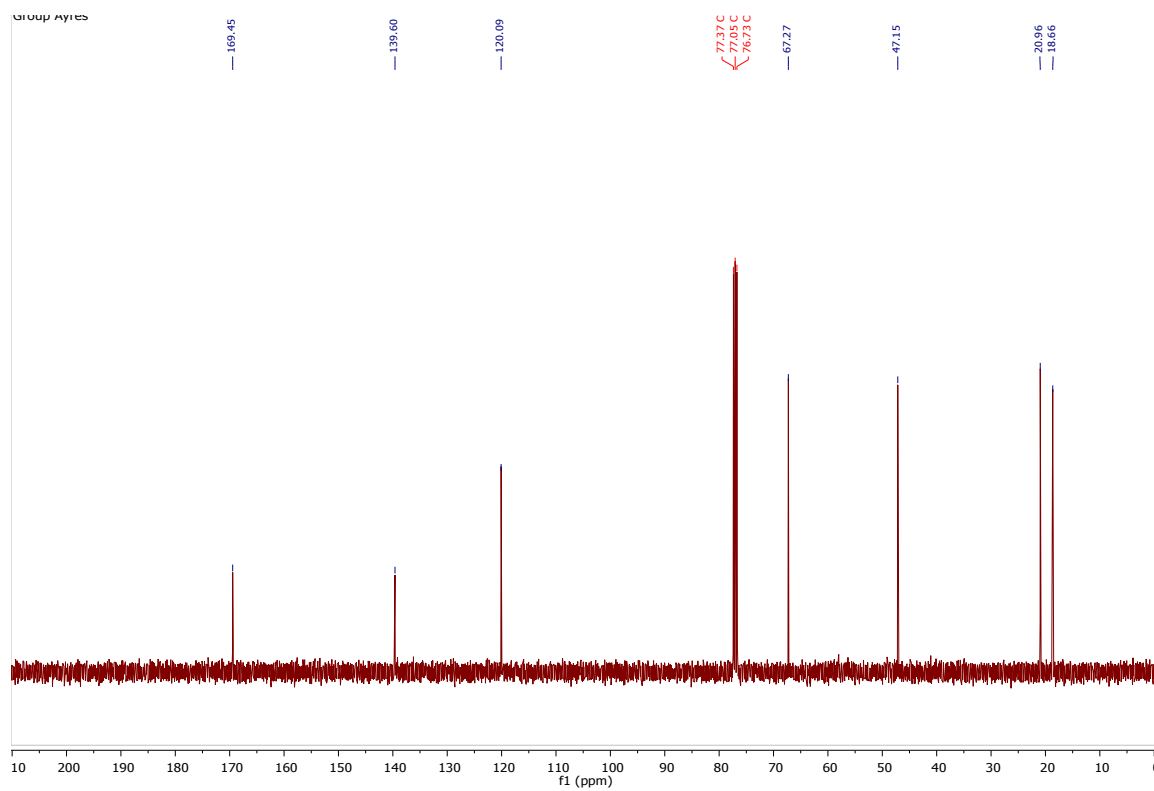

**Figure S2.**  $^{13}\text{C}$  NMR spectrum of HPMA.

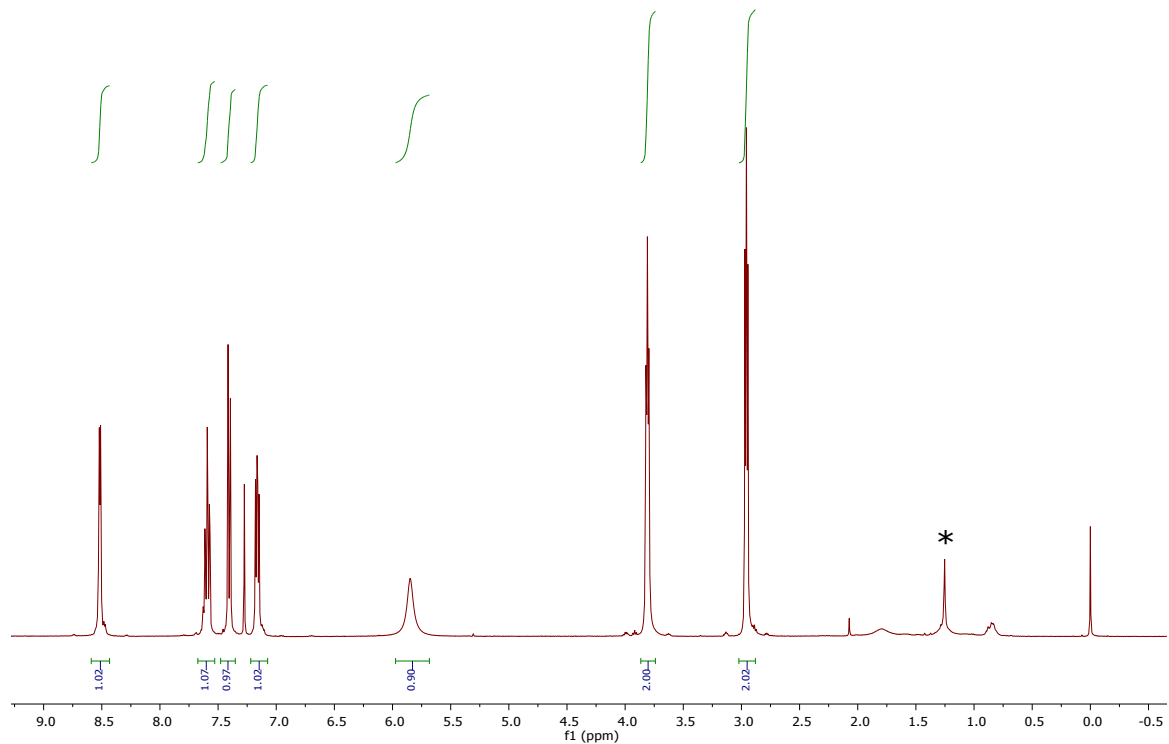

**Figure S3.**  $^1\text{H}$  NMR spectrum of hydroxyethylpyridyl disulfide (HPDS). (\* Solvent- Ethyl acetate)

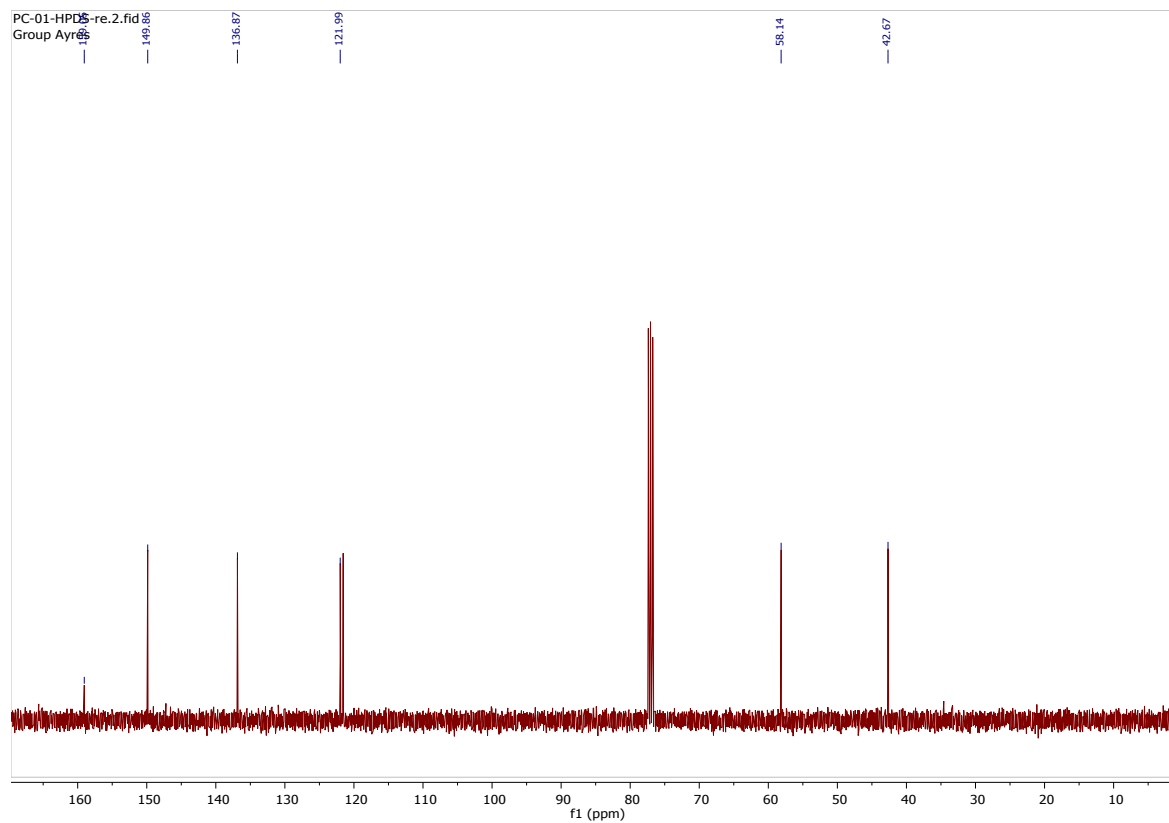

**Figure S4.**  $^{13}\text{C}$  NMR spectrum of HPDS.

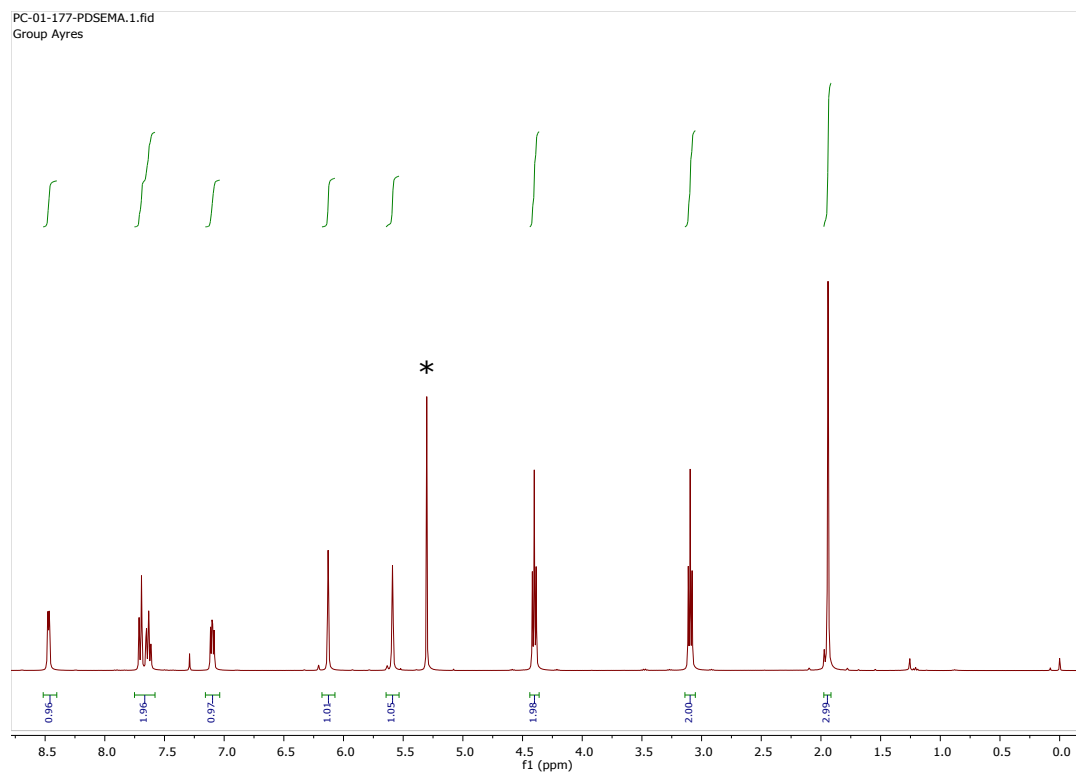

**Figure S5.**  $^1\text{H}$  NMR spectrum of pyridyl disulfide ethylmethacrylate (PDSEMA). (\* indicates the dichloromethane solvent)

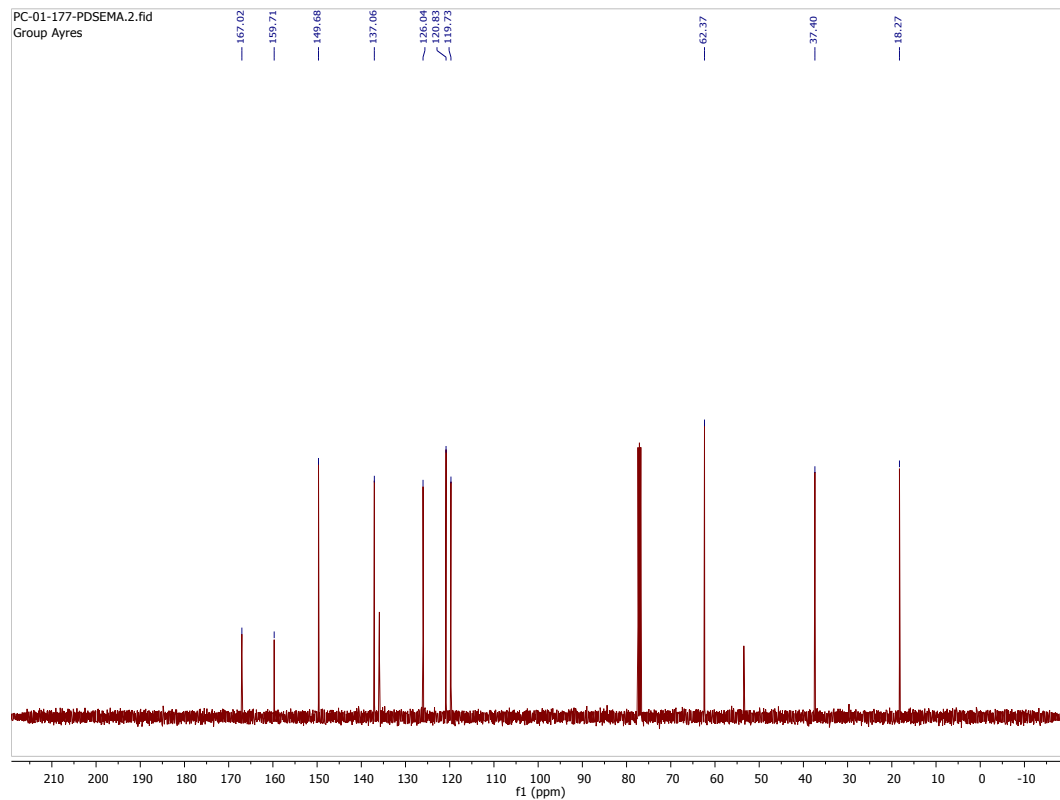

**Figure S6.**  $^{13}\text{C}$  NMR spectrum of PDSEMA.

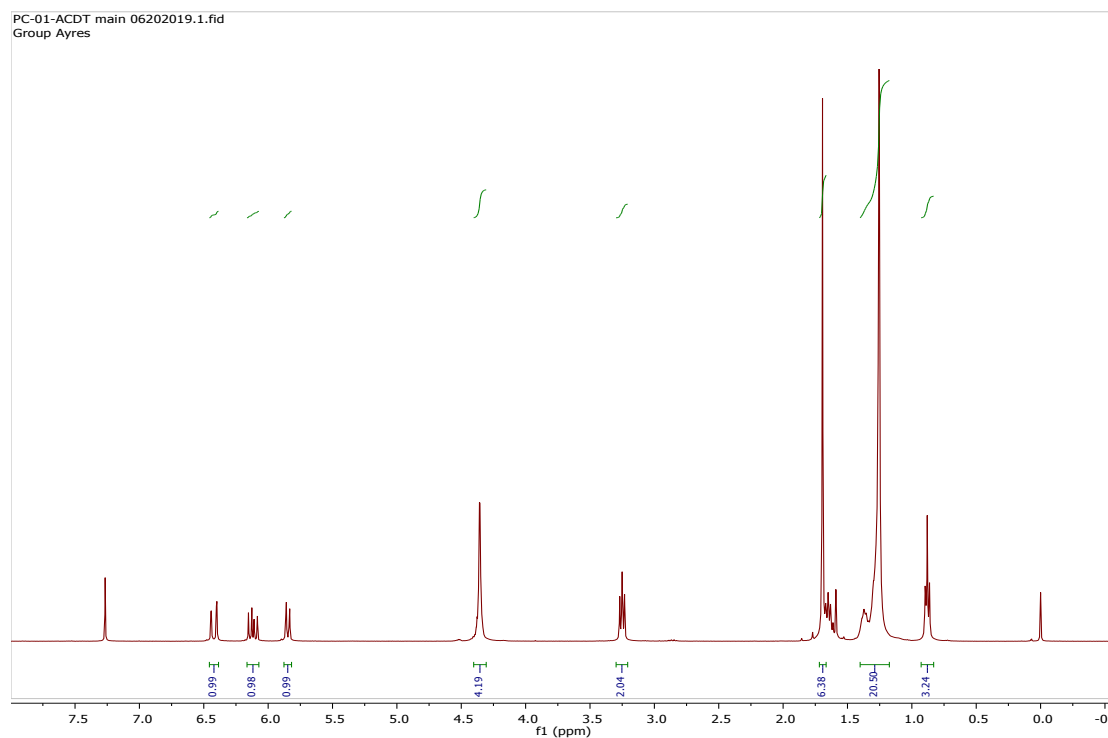

**Figure S7.**  $^1\text{H}$  NMR spectrum of 2-((2-(((Dodecylthio)carbonothioylthio)-2-methylpropanoyl)oxy)ethyl Acrylate (ACDT).

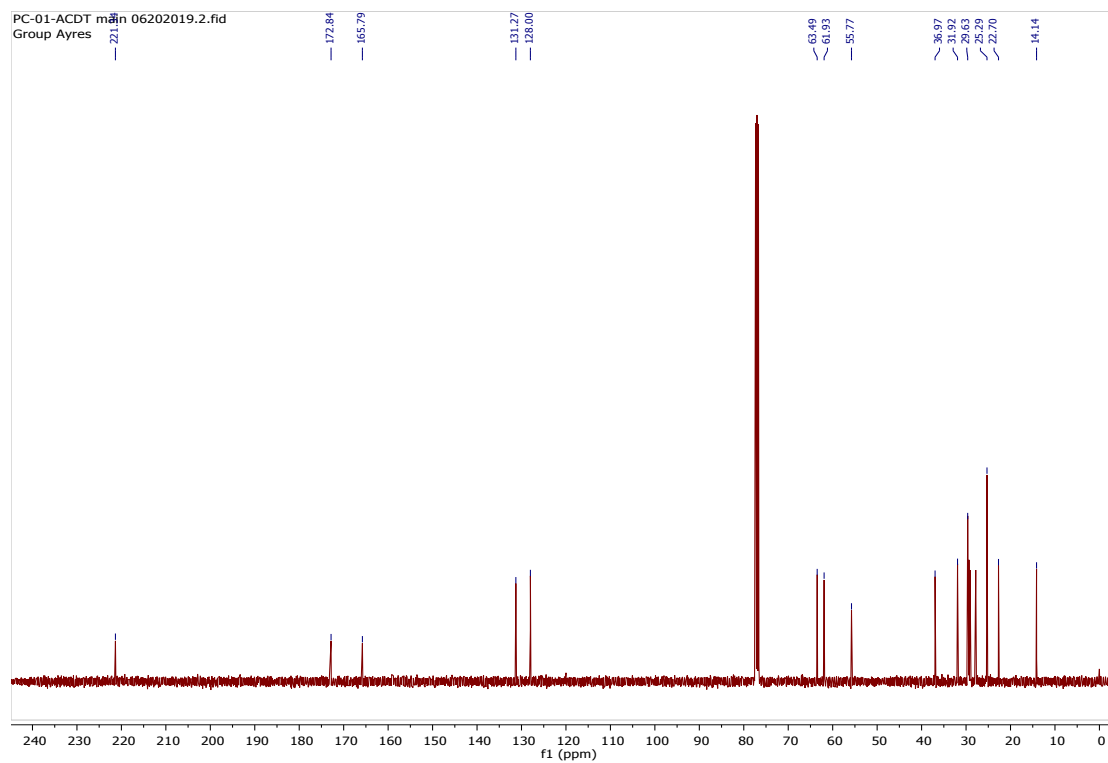

**Figure S8.**  $^{13}\text{C}$  NMR spectrum of ACDT.

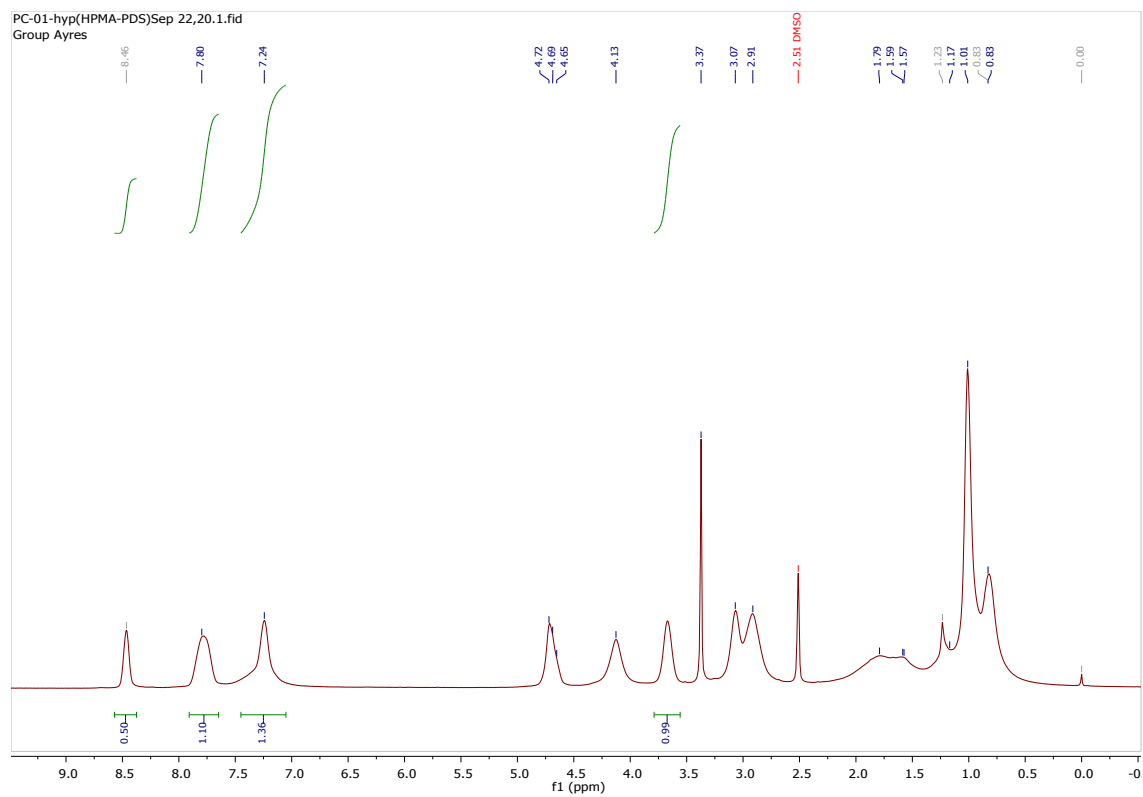

**Figure S9.**  $^1\text{H}$  NMR spectrum of hb-poly(HPMA<sub>84</sub>-stat-PDSEMA<sub>24</sub>).

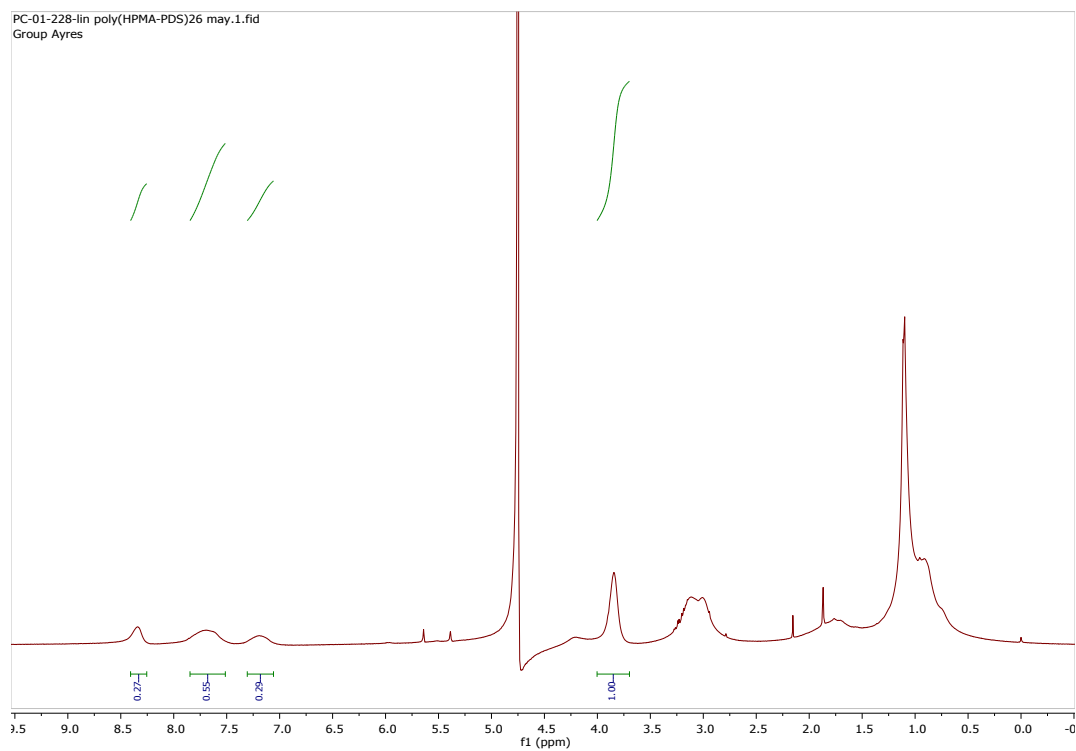

**Figure S10.**  $^1\text{H}$  NMR spectrum of l-poly(HPMA<sub>104</sub>-stat-PDSEMA<sub>16</sub>).

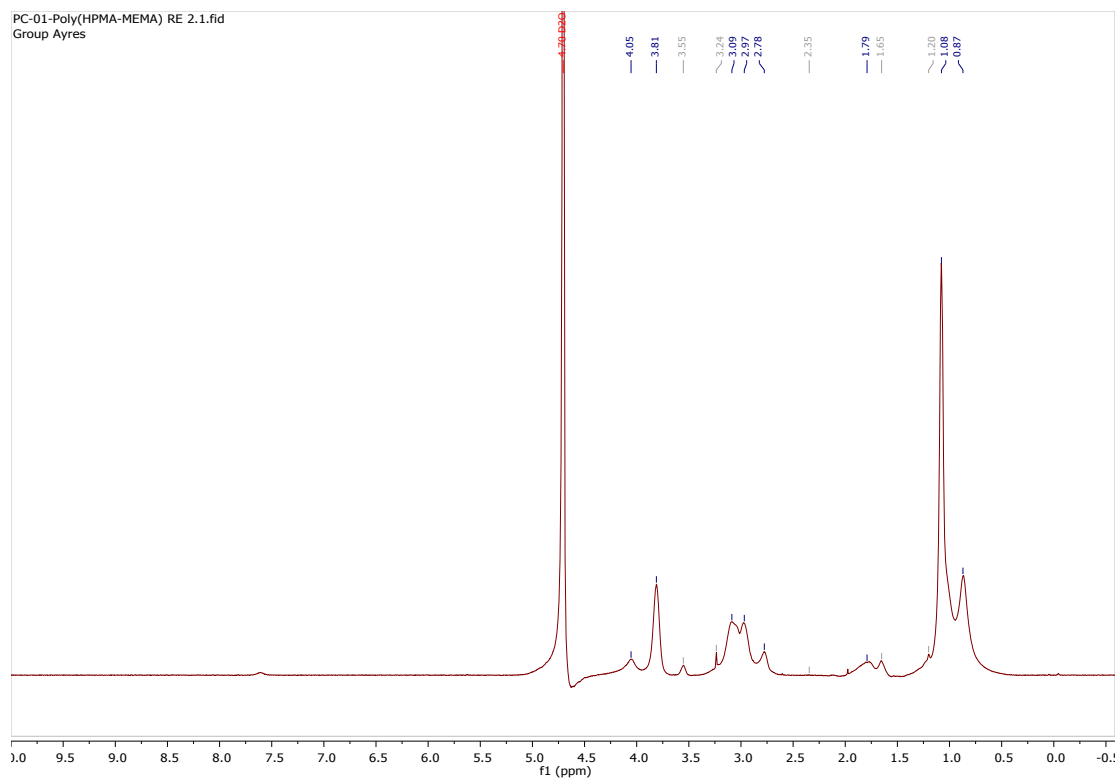

**Figure S11.**  $^1\text{H}$  NMR spectrum of hb-poly(HPMA<sub>84</sub>-stat-MEMA<sub>24</sub>).

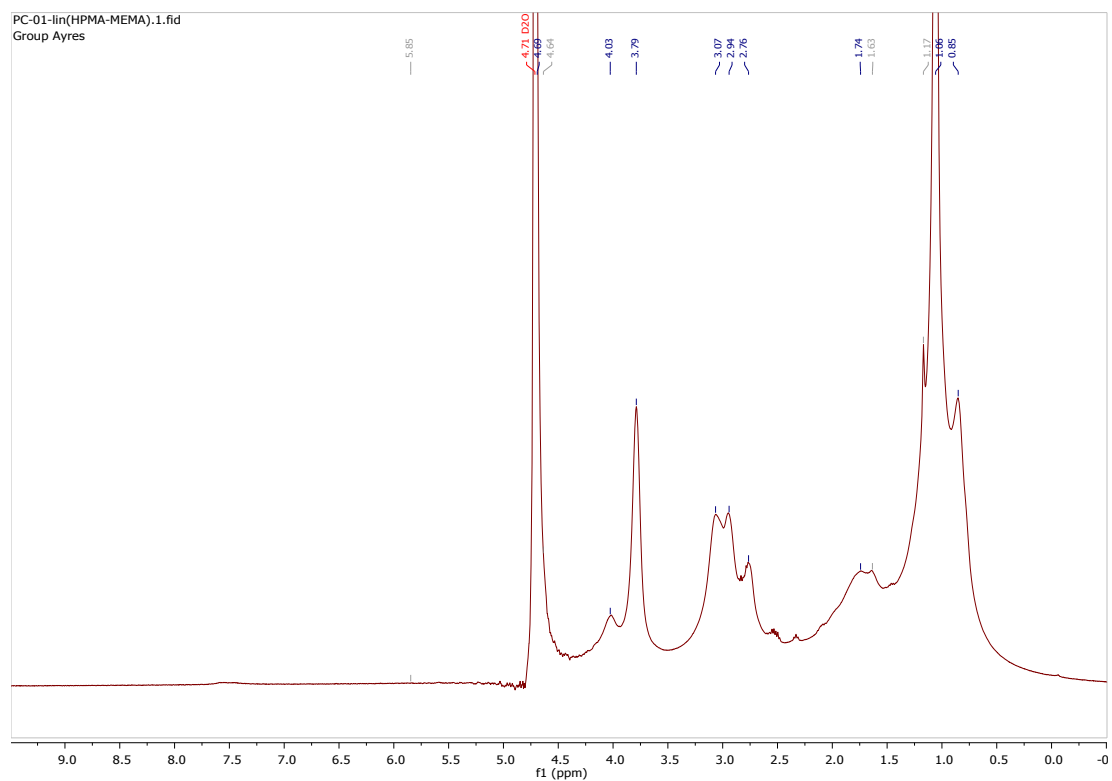

**Figure S12.**  $^1\text{H}$  NMR spectrum of l-poly(HPMA<sub>104</sub>-stat-MEMA<sub>16</sub>).



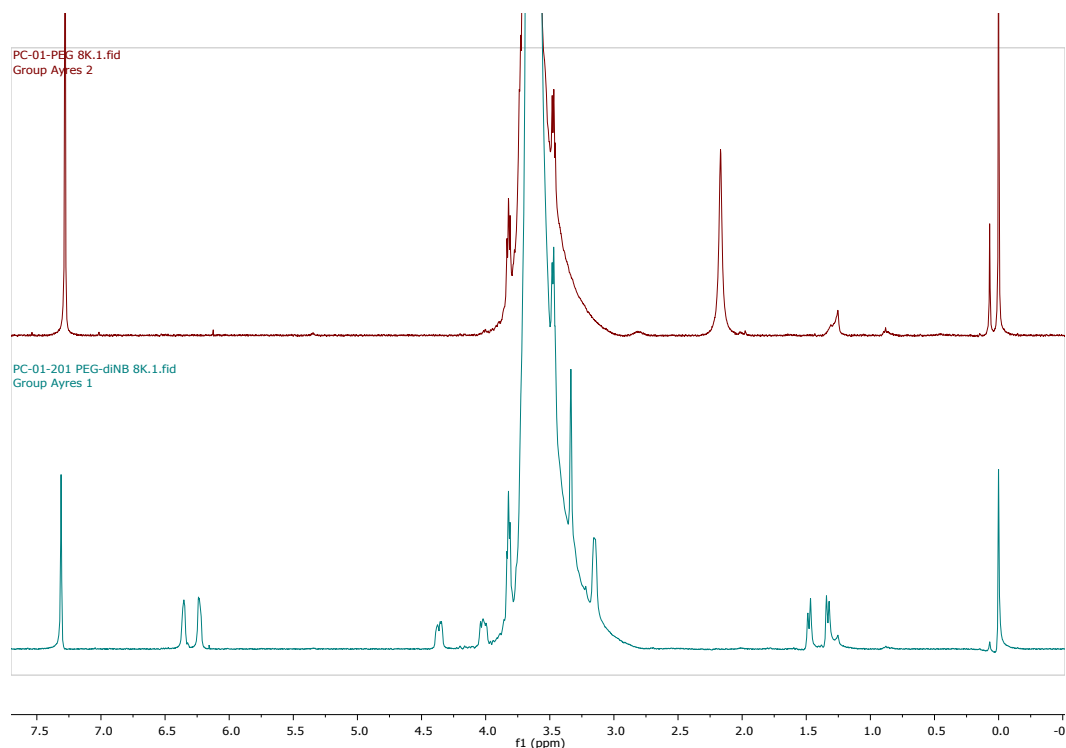

**Figure S13.**  $^1\text{H}$  NMR spectrum of PEG (top figure) and Norbornene modified PEG (PEG-diNB) (bottom figure).

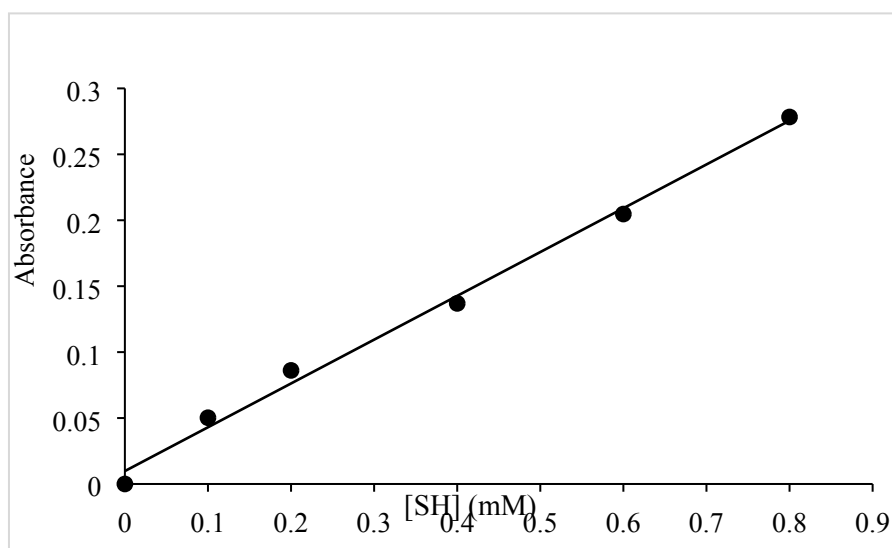

**Figure S14.** Standard calibration curve of Ellman's assay using DTT. For the assay, 200  $\mu\text{L}$  of 2 mM (5,5- dithiobis[2nitrobenzoic acid]) (DTNB) solution, 290  $\mu\text{L}$  of ultrapure water, 500  $\mu\text{L}$  of 0.5 M tris buffer solution at pH 8, and 10  $\mu\text{L}$  of a solution of 50 mg of copolymer dissolved in 1 mL of ultrapure water were mixed and left in the dark for ten minutes. Optical absorbance of the solution was measured at  $\lambda_{\text{max}} = 412 \text{ nm}$ .

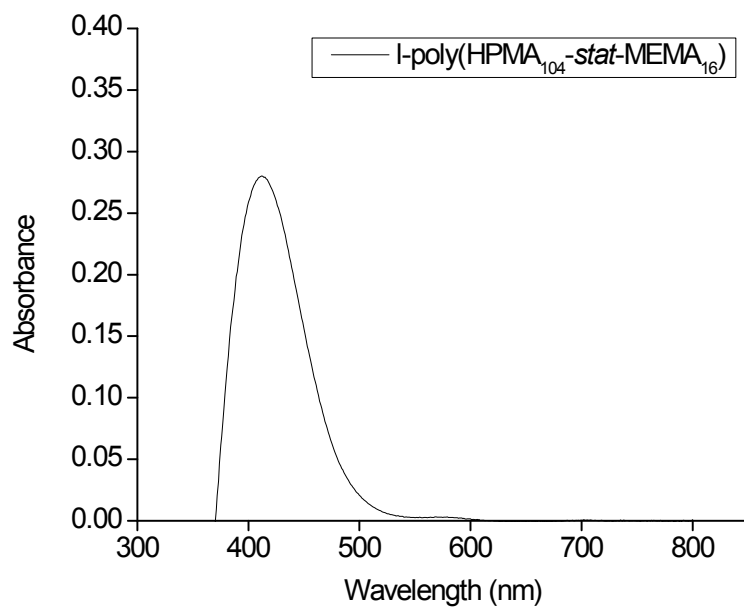

**Figure S15.** UV-VIS absorbance curve for l-poly(HPMA<sub>104</sub>-stat-MEMA<sub>16</sub>).

**Table S1.** Storage moduli, swelling ratio, and gel fractions for the hb-Poly(HPMA-*stat*-MEMA)s prepared in this work taking 10 wt% solid content at different thiol to ene (T:E) ratios.

| Polymer                                                        | T:E | % solids | G' (kPa) | Swelling ratio | Gel fraction (%) |
|----------------------------------------------------------------|-----|----------|----------|----------------|------------------|
| hb-poly(HPMA <sub>84</sub> - <i>stat</i> -MEMA <sub>24</sub> ) | 1:1 | 10       | 4.2      | 15.30          | 94               |
| hb-poly(HPMA <sub>84</sub> - <i>stat</i> -MEMA <sub>24</sub> ) | 2:1 | 10       | 5.8      | 15.18          | 93               |
| hb-poly(HPMA <sub>84</sub> - <i>stat</i> -MEMA <sub>24</sub> ) | 3:1 | 10       | 7.6      | 15.02          | 92               |
| hb-poly(HPMA <sub>84</sub> - <i>stat</i> -MEMA <sub>24</sub> ) | 4:1 | 10       | 10.2     | 14.83          | 90               |
| hb-poly(HPMA <sub>84</sub> - <i>stat</i> -MEMA <sub>24</sub> ) | 5:1 | 10       | 13.1     | 13.90          | 89               |

**Table S2.** Storage moduli, swelling ratio, and gel fractions for the hb-Poly(HPMA<sub>84</sub>-stat-MEMA<sub>24</sub>)s prepared in this work using 20 wt% solid content and 5 wt% solid content.

| Polymer                                               | T:E | % solids | G' (kPa) | Swelling ratio | Gel fraction (%) |
|-------------------------------------------------------|-----|----------|----------|----------------|------------------|
| hb-poly(HPMA <sub>84</sub> -stat-MEMA <sub>24</sub> ) | 1:1 | 20       | 6.82     | 14.85          | 93               |
| hb-poly(HPMA <sub>84</sub> -stat-MEMA <sub>24</sub> ) | 2:1 | 20       | 8.91     | 14.61          | 90               |
| hb-poly(HPMA <sub>84</sub> -stat-MEMA <sub>24</sub> ) | 3:1 | 20       | 11.05    | 14.43          | 86               |
| hb-poly(HPMA <sub>84</sub> -stat-MEMA <sub>24</sub> ) | 4:1 | 20       | 13.09    | 13.82          | 85               |
| hb-poly(HPMA <sub>84</sub> -stat-MEMA <sub>24</sub> ) | 5:1 | 20       | 16.3     | 13.14          | 82               |
| hb-poly(HPMA <sub>84</sub> -stat-MEMA <sub>24</sub> ) | 1:1 | 5        | 1.6      | 16.82          | 93               |
| hb-poly(HPMA <sub>84</sub> -stat-MEMA <sub>24</sub> ) | 2:1 | 5        | 1.8      | 16.70          | 92               |
| hb-poly(HPMA <sub>84</sub> -stat-MEMA <sub>24</sub> ) | 3:1 | 5        | 1.9      | 16.61          | 91               |
| hb-poly(HPMA <sub>84</sub> -stat-MEMA <sub>24</sub> ) | 4:1 | 5        | 2.1      | 16.41          | 90               |
| hb-poly(HPMA <sub>84</sub> -stat-MEMA <sub>24</sub> ) | 5:1 | 5        | 2.2      | 16.32          | 90               |

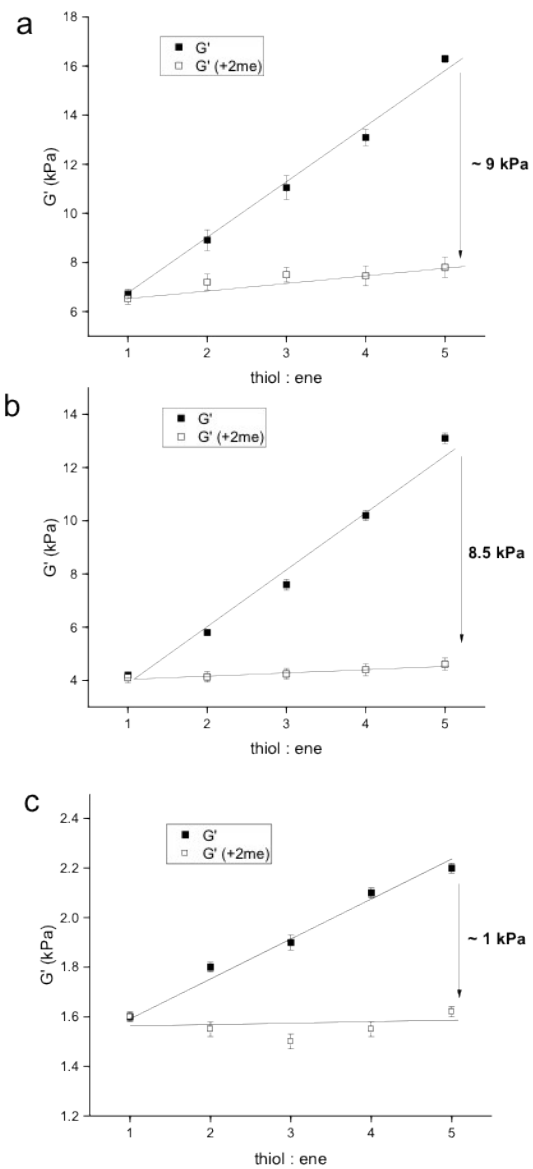

**Figure S16.** Storage moduli,  $G'$ , of hydrogels synthesized using hb-poly(HPMA<sub>84</sub>-stat-MEMA<sub>24</sub>) using a) 20 wt %, b) 10 wt%, and c) 5 wt % solids with different thiol to ene ratios before (black squares) and after (white squares) softening with 2-mercaptoethanol.

**Table S3.** Storage moduli and thiol concentrations before and after adding 2-mercaptoethanol for gels made using the hb-Poly(HPMA-*stat*-MEMA)s prepared in this work using 10 wt% solid content at different thiol to ene (T:E) ratios.

| Polymer                                                        | T:E | % solids | Solvent (ml) | G' (kPa) | G' (+2me, kPa) | [SH] (added) | [SH] (+2me, mmol) | Theoretical [SH] (+2me, mmol) |
|----------------------------------------------------------------|-----|----------|--------------|----------|----------------|--------------|-------------------|-------------------------------|
| hb-poly(HPMA <sub>84</sub> - <i>stat</i> -MEMA <sub>24</sub> ) | 1:1 | 10       | 1            | 4.1      | 4.0            | 0.021        | 0.001             | -                             |
| hb-poly(HPMA <sub>84</sub> - <i>stat</i> -MEMA <sub>24</sub> ) | 2:1 | 10       | 1            | 5.8      | 4.2            | 0.036        | 0.015             | 0.018                         |
| hb-poly(HPMA <sub>84</sub> - <i>stat</i> -MEMA <sub>24</sub> ) | 3:1 | 10       | 1            | 7.6      | 4.4            | 0.048        | 0.030             | 0.032                         |
| hb-poly(HPMA <sub>84</sub> - <i>stat</i> -MEMA <sub>24</sub> ) | 4:1 | 10       | 1            | 10.2     | 4.4            | 0.056        | 0.041             | 0.042                         |
| hb-poly(HPMA <sub>84</sub> - <i>stat</i> -MEMA <sub>24</sub> ) | 5:1 | 10       | 1            | 13.1     | 4.5            | 0.064        | 0.048             | 0.051                         |

**Table S4.** Storage moduli and thiol concentrations before and after adding 2-mercaptoethanol for gels made using the l-Poly(HPMA-*stat*-MEMA)s prepared in this work at different thiol to ene (T:E) ratios.

| Polymer                                                        | T:E | % solids | Solvent (ml) | G' (kPa) | G' (+2me, kPa) | [SH] (added) | [SH] (+2me, mmol) | Theoretical [SH] (+2me, mmol) |
|----------------------------------------------------------------|-----|----------|--------------|----------|----------------|--------------|-------------------|-------------------------------|
| l-poly(HPMA <sub>104</sub> - <i>stat</i> -MEMA <sub>16</sub> ) | 1:1 | 11       | 1            | 3.1      | 3.0            | 0.021        | 0.001             | -                             |
| l-poly(HPMA <sub>104</sub> - <i>stat</i> -MEMA <sub>16</sub> ) | 2:1 | 12       | 1            | 4.3      | 3.1            | 0.036        | 0.016             | 0.018                         |
| l-poly(HPMA <sub>104</sub> - <i>stat</i> -MEMA <sub>16</sub> ) | 3:1 | 12       | 1            | 5.6      | 3.3            | 0.048        | 0.029             | 0.032                         |
| l-poly(HPMA <sub>104</sub> - <i>stat</i> -MEMA <sub>16</sub> ) | 4:1 | 12       | 1            | 7.2      | 3.3            | 0.056        | 0.040             | 0.042                         |
| l-poly(HPMA <sub>104</sub> - <i>stat</i> -MEMA <sub>16</sub> ) | 5:1 | 13       | 1            | 8.1      | 3.7            | 0.064        | 0.049             | 0.051                         |
| l-poly(HPMA <sub>104</sub> - <i>stat</i> -MEMA <sub>16</sub> ) | 1:1 | 10       | 1.11         | 3.0      | 2.8            | 0.021        | 0.002             | -                             |
| l-poly(HPMA <sub>104</sub> - <i>stat</i> -MEMA <sub>16</sub> ) | 2:1 | 10       | 1.16         | 4.2      | 3.2            | 0.036        | 0.015             | 0.018                         |
| l-poly(HPMA <sub>104</sub> - <i>stat</i> -MEMA <sub>16</sub> ) | 3:1 | 10       | 1.22         | 5.4      | 3.4            | 0.048        | 0.028             | 0.032                         |
| l-poly(HPMA <sub>104</sub> - <i>stat</i> -MEMA <sub>16</sub> ) | 4:1 | 10       | 1.24         | 6.7      | 3.5            | 0.056        | 0.039             | 0.042                         |
| l-poly(HPMA <sub>104</sub> - <i>stat</i> -MEMA <sub>16</sub> ) | 5:1 | 10       | 1.28         | 7.5      | 3.8            | 0.064        | 0.050             | 0.051                         |

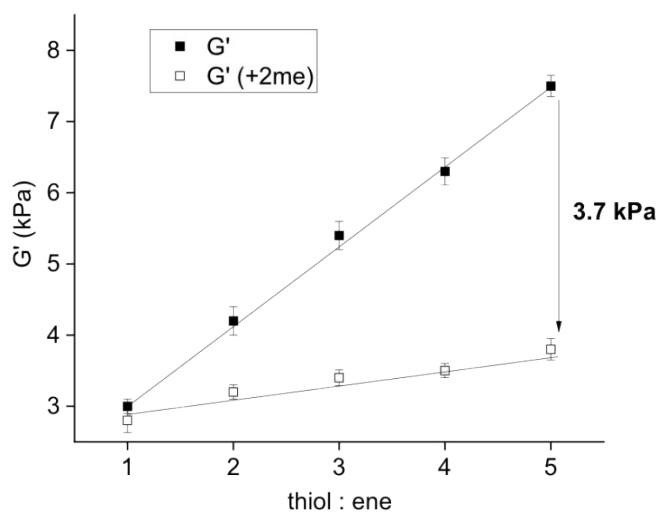

**Figure S17.** Storage moduli,  $G'$ , of hydrogels synthesized using l-poly(HPMA<sub>104</sub>-stat-MEMA<sub>16</sub>) at the same thiol concentrations and weight percent solids to the hyperbranched polymers with different thiol to ene ratios before (black squares) and after (white squares) softening with 2-mercaptoethanol.

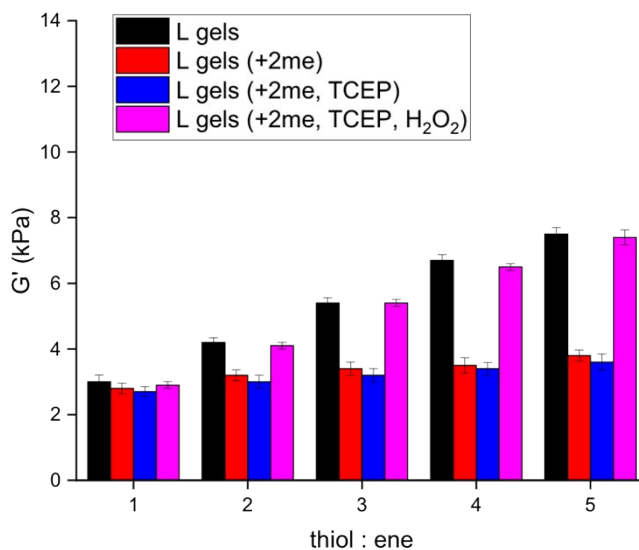

**Figure S18.** Storage moduli,  $G'$ , before (black bar) and after softening of hydrogels (red bar) and then reducing with TCEP (blue bar) and after peroxide-induced healing of gels (pink bar) prepared using l-poly(HPMA<sub>104</sub>-stat-MEMA<sub>16</sub>) maintaining the same thiol concentration and weight percent solids as the hyperbranched polymers at that thiol to ene ratio.

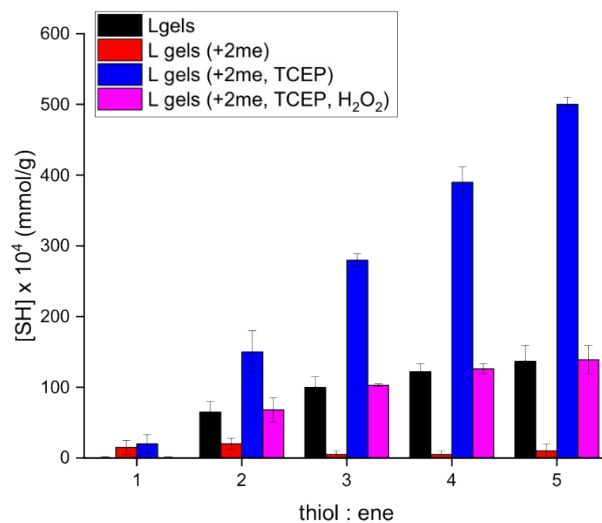

**Figure S19.** Thiol concentrations ( $\times 10^4$  mmol/g) before (black bar) and after softening of hydrogels (red bar) and then reducing with TCEP (blue bar) and after peroxide-induced healing of gels (pink bar) prepared using l-poly(HPMA<sub>104</sub>-stat-MEMA<sub>16</sub>) maintaining the same thiol concentration and weight percent solids as the hyperbranched polymers at that thiol to ene ratio.
